# Supplementary material
Source: PubMed Central journal article supplement (PMC4794011)
Supplement: chec023919.ww5_default.pdf [file chec023919.ww5_default.pdf]

**Appendix 5:** Main baseline characteristics by exposure status in secondary cohort [posted as supplied by author]

|                                                       | <b>Non- ICD<br/>(N=17,853)</b> | <b>ICD<br/>(N=412)</b> | <b>p-value</b> |
|-------------------------------------------------------|--------------------------------|------------------------|----------------|
| Age                                                   | 80.0 (7.8)                     | 75.5 (5.8)             | <0.0001        |
| Male                                                  | 9321 (52%)                     | 289 (70%)              | <0.0001        |
| White                                                 | 15068 (84%)                    | 320 (78%)              | 0.0004         |
| Ejection fraction (%) (Median, IQR)                   | 29 (20-33)                     | 25 (20-30)             | <0.0001        |
| Charlson scores (Median, IQR)                         | 3 (1-4)                        | 3 (2-5)                | 0.0072         |
| ≥ 1 hospitalization for any causes                    | 9168 (51%)                     | 259 (63%)              | <0.0001        |
| ≥ 1 hospitalization for heart failure                 | 2844 (16%)                     | 142 (34%)              | <0.0001        |
| ≥ 1 hospitalization for myocardial infarction (MI)    | 203 (1%)                       | 7 (2%)                 | 0.25           |
| ≥ 1 hospitalization for non-MI ischemic heart disease | 104 (1%)                       | 4 (1%)                 | 0.31           |
| ≥ 1 hospitalization for other cardiac disease         | 51 (0%)                        | 1 (0%)                 | 1.00           |
| ≥ 1 hospitalization for non-cardiac causes            | 6501 (36%)                     | 127 (31%)              | 0.02           |
| Number of prior outpatient visits (Mean, SD)          | 10.3 (9.4)                     | 12.1 (9.3)             | 0.0001         |
| ≥1 prior outpatient visit                             | 16167 (91%)                    | 396 (96%)              | <0.0001        |
| ≥1 prior SNF admission                                | 2679 (15%)                     | 41 (10%)               | 0.004          |
| HF due to ischemic causes                             | 14165 (79%)                    | 357 (87%)              | <0.0001        |
| Any cerebrovascular disease                           | 3860 (22%)                     | 107 (26%)              | 0.04           |
| Hemorrhagic stroke                                    | 198 (1%)                       | 11 (3%)                | 0.008          |
| Ischemic stroke                                       | 1376 (8%)                      | 38 (9%)                | 0.26           |
| Transient ischemic attack                             | 1175 (7%)                      | 25 (6%)                | 0.76           |
| Other cerebrovascular disease                         | 2741 (15%)                     | 78 (19%)               | 0.053          |
| Peripheral vascular disease                           | 4147 (23%)                     | 98 (24%)               | 0.81           |
| Dementia                                              | 3503 (20%)                     | 41 (10%)               | <0.0001        |
| Depression                                            | 2821 (16%)                     | 67 (16%)               | 0.78           |
| Any liver disease                                     | 1118 (6%)                      | 33 (8%)                | 0.15           |
| Gastrointestinal ulcer/bleeding                       | 2755 (15%)                     | 54 (13%)               | 0.21           |
| Dialysis                                              | 527 (3%)                       | 9 (2%)                 | 0.46           |
| Chronic kidney disease                                | 8009 (45%)                     | 201 (49%)              | 0.12           |
| Chronic obstructive pulmonary disease                 | 8283 (46%)                     | 219 (53%)              | 0.007          |
| Cancer (except non-melanoma skin cancer)              | 3020 (17%)                     | 69 (17%)               | 1.0            |
| Metastatic cancer                                     | 566 (3%)                       | 11 (3%)                | 0.67           |
| Diabetes                                              | 8648 (48%)                     | 237 (58%)              | <0.0001        |
| Systolic blood pressure (SBP) (Median, IQR)           | 133 (116-152)                  | 127 (113-143)          | <0.0001        |
| SBP missing                                           | 9230 (52)                      | 7 (2)                  |                |
| Serum sodium (Median, IQR)                            | 138 (136-141)                  | 138 (136-140)          | 0.71           |
| Sodium missing                                        | 12032 (67)                     | 8 (2)                  |                |
| Serum B-type natriuretic peptide (BNP) (Median, IQR)  | 1249 (657-2258)                | 915 (402-1801)         | 0.0009         |
| BNP missing                                           | 12810 (72)                     | 206 (50)               |                |
| Serum creatinine (SCr) (Median, IQR)                  | 1.3 (1.0-1.8)                  | 1.3 (1.1-1.7)          | 0.04           |
| SCr missing                                           | 11488 (64)                     | 4 (1)                  |                |
| Estimated glomerular filtration rate (Median, IQR)    | 47 (32-64)                     | 55 (40-69)             | <0.0001        |
